# Supplementary material
Source: Royal Society of Chemistry journal article supplement (doi:10.1039/d6dt00380j)
Supplement: d6dt00380j1.pdf [file d6dt00380j1.pdf]

## Electronic Supporting Information

### Synthesis and Characterization of Hydrated Alkali Metal Calcium Nitrates

#### ACa(NO<sub>3</sub>)<sub>3</sub>·2H<sub>2</sub>O (A = NH<sub>4</sub>, Rb, Cs) as Short Ultraviolet Birefringent Materials

Hussin Elkik,<sup>a,b</sup> Muhammad Mujahid Iqbal,<sup>a,b</sup> Aqsa Munawar,<sup>a,b</sup> Zhihua Yang,<sup>a,b</sup> Fangfang Zhang,<sup>\*,a,b</sup> and Shilie Pan<sup>\*,a,b</sup>

<sup>a</sup> Research Center for Crystal Materials; CAS Key Laboratory of Functional Materials and Devices for Special Environmental Conditions; Xinjiang Key Laboratory of Functional Crystal Materials; Xinjiang Technical Institute of Physics and Chemistry, Chinese Academy of Sciences, 40-1 South Beijing Road, Urumqi 830011, China.

<sup>b</sup> Center of Materials Science and Optoelectronics Engineering, University of Chinese Academy of Sciences, Beijing 100049, China.

<sup>c</sup> Department of Chemistry, Faculty of Science, Qena University, Qena 83523, Egypt.

#### Table of contents

| Sections  | Titles                                                                                                                                                                                                                                                                                                                                                                                                                                                                                                                                                                                                                                                                              |
|-----------|-------------------------------------------------------------------------------------------------------------------------------------------------------------------------------------------------------------------------------------------------------------------------------------------------------------------------------------------------------------------------------------------------------------------------------------------------------------------------------------------------------------------------------------------------------------------------------------------------------------------------------------------------------------------------------------|
| Table S1  | Crystallographic data and structure refinement for ACa(NO <sub>3</sub> ) <sub>3</sub> ·2H <sub>2</sub> O (A = NH <sub>4</sub> , Rb, Cs).                                                                                                                                                                                                                                                                                                                                                                                                                                                                                                                                            |
| Table S2  | Bond lengths (Å) and angles (°) for (NH <sub>4</sub> )Ca(NO <sub>3</sub> ) <sub>3</sub> (H <sub>2</sub> O) <sub>2</sub> .                                                                                                                                                                                                                                                                                                                                                                                                                                                                                                                                                           |
| Table S3  | Bond lengths (Å) and angles (°) for RbCa(NO <sub>3</sub> ) <sub>3</sub> (H <sub>2</sub> O) <sub>2</sub> .                                                                                                                                                                                                                                                                                                                                                                                                                                                                                                                                                                           |
| Table S4  | Bond lengths (Å) and angles (°) for CsCa(NO <sub>3</sub> ) <sub>3</sub> (H <sub>2</sub> O) <sub>2</sub> .                                                                                                                                                                                                                                                                                                                                                                                                                                                                                                                                                                           |
| Table S5  | Atomic coordinates (×10 <sup>4</sup> ), equivalent isotropic displacement parameters (Å <sup>2</sup> × 10 <sup>3</sup> ), and BVS calculations of (NH <sub>4</sub> )Ca(NO <sub>3</sub> ) <sub>3</sub> (H <sub>2</sub> O) <sub>2</sub> .                                                                                                                                                                                                                                                                                                                                                                                                                                             |
| Table S6  | Atomic coordinates (×10 <sup>4</sup> ), equivalent isotropic displacement parameters (Å <sup>2</sup> × 10 <sup>3</sup> ), and BVS calculations of RbCa(NO <sub>3</sub> ) <sub>3</sub> (H <sub>2</sub> O) <sub>2</sub> .                                                                                                                                                                                                                                                                                                                                                                                                                                                             |
| Table S7  | Atomic coordinates (×10 <sup>4</sup> ), equivalent isotropic displacement parameters (Å <sup>2</sup> × 10 <sup>3</sup> ), and BVS calculations of CsCa(NO <sub>3</sub> ) <sub>3</sub> (H <sub>2</sub> O) <sub>2</sub> .                                                                                                                                                                                                                                                                                                                                                                                                                                                             |
| Table S8  | Anisotropic displacement parameters (Å <sup>2</sup> × 10 <sup>3</sup> ) for (NH <sub>4</sub> )Ca(NO <sub>3</sub> ) <sub>3</sub> (H <sub>2</sub> O) <sub>2</sub> .                                                                                                                                                                                                                                                                                                                                                                                                                                                                                                                   |
| Table S9  | Anisotropic displacement parameters (Å <sup>2</sup> × 10 <sup>3</sup> ) for RbCa(NO <sub>3</sub> ) <sub>3</sub> (H <sub>2</sub> O) <sub>2</sub> .                                                                                                                                                                                                                                                                                                                                                                                                                                                                                                                                   |
| Table S10 | Anisotropic displacement parameters (Å <sup>2</sup> × 10 <sup>3</sup> ) for CsCa(NO <sub>3</sub> ) <sub>3</sub> (H <sub>2</sub> O) <sub>2</sub> .                                                                                                                                                                                                                                                                                                                                                                                                                                                                                                                                   |
| Table S11 | Hydrogen coordinates (×10 <sup>4</sup> ) and isotropic displacement parameters (Å <sup>2</sup> × 10 <sup>3</sup> ) for (NH <sub>4</sub> )Ca(NO <sub>3</sub> ) <sub>3</sub> (H <sub>2</sub> O) <sub>2</sub> .                                                                                                                                                                                                                                                                                                                                                                                                                                                                        |
| Table S12 | Hydrogen coordinates (×10 <sup>4</sup> ) and isotropic displacement parameters (Å <sup>2</sup> × 10 <sup>3</sup> ) for RbCa(NO <sub>3</sub> ) <sub>3</sub> (H <sub>2</sub> O) <sub>2</sub> .                                                                                                                                                                                                                                                                                                                                                                                                                                                                                        |
| Table S13 | Hydrogen coordinates (×10 <sup>4</sup> ) and isotropic displacement parameters (Å <sup>2</sup> × 10 <sup>3</sup> ) for CsCa(NO <sub>3</sub> ) <sub>3</sub> (H <sub>2</sub> O) <sub>2</sub> .                                                                                                                                                                                                                                                                                                                                                                                                                                                                                        |
| Table S14 | Hydrogen bonds for (NH <sub>4</sub> )Ca(NO <sub>3</sub> ) <sub>3</sub> (H <sub>2</sub> O) <sub>2</sub> (Å and °).                                                                                                                                                                                                                                                                                                                                                                                                                                                                                                                                                                   |
| Table S15 | Hydrogen bonds for RbCa(NO <sub>3</sub> ) <sub>3</sub> (H <sub>2</sub> O) <sub>2</sub> (Å and °).                                                                                                                                                                                                                                                                                                                                                                                                                                                                                                                                                                                   |
| Table S16 | Hydrogen bonds for CsCa(NO <sub>3</sub> ) <sub>3</sub> (H <sub>2</sub> O) <sub>2</sub> (Å and °).                                                                                                                                                                                                                                                                                                                                                                                                                                                                                                                                                                                   |
| Table S17 | The birefringence of ACa(NO <sub>3</sub> ) <sub>3</sub> ·2H <sub>2</sub> O (A = NH <sub>4</sub> , Rb, Cs) at the wavelength of 546 nm with polarizing microscope.                                                                                                                                                                                                                                                                                                                                                                                                                                                                                                                   |
| Table S18 | Summary of some alkali/alkaline-earth metal nitrate compounds reported in the literature.                                                                                                                                                                                                                                                                                                                                                                                                                                                                                                                                                                                           |
| Fig. S1   | The coordination modes of N <sup>5+</sup> (1–3) (a,d,g), Ca <sup>2+</sup> (1) (b,e,h), and N <sup>3+</sup> (4) (c)/ Rb <sup>+</sup> (f)/ Cs <sup>+</sup> (i) in (NH <sub>4</sub> )Ca(NO <sub>3</sub> ) <sub>3</sub> (H <sub>2</sub> O) <sub>2</sub> , RbCa(NO <sub>3</sub> ) <sub>3</sub> (H <sub>2</sub> O) <sub>2</sub> , and CsCa(NO <sub>3</sub> ) <sub>3</sub> (H <sub>2</sub> O) <sub>2</sub> , respectively.                                                                                                                                                                                                                                                                 |
| Fig. S2   | Ball-and-stick models of (NH <sub>4</sub> )Ca(NO <sub>3</sub> ) <sub>3</sub> (H <sub>2</sub> O) <sub>2</sub> (a) and CsCa(NO <sub>3</sub> ) <sub>3</sub> (H <sub>2</sub> O) <sub>2</sub> (b).                                                                                                                                                                                                                                                                                                                                                                                                                                                                                       |
| Fig. S3   | EDS for (NH <sub>4</sub> )Ca(NO <sub>3</sub> ) <sub>3</sub> (H <sub>2</sub> O) <sub>2</sub> (a), RbCa(NO <sub>3</sub> ) <sub>3</sub> (H <sub>2</sub> O) <sub>2</sub> (b), and CsCa(NO <sub>3</sub> ) <sub>3</sub> (H <sub>2</sub> O) <sub>2</sub> (c).                                                                                                                                                                                                                                                                                                                                                                                                                              |
| Fig. S4   | The IR spectra of (NH <sub>4</sub> )Ca(NO <sub>3</sub> ) <sub>3</sub> (H <sub>2</sub> O) <sub>2</sub> (a), RbCa(NO <sub>3</sub> ) <sub>3</sub> (H <sub>2</sub> O) <sub>2</sub> (b), and CsCa(NO <sub>3</sub> ) <sub>3</sub> (H <sub>2</sub> O) <sub>2</sub> (c).                                                                                                                                                                                                                                                                                                                                                                                                                    |
| Fig. S5   | Calculated band structures by the HSE06 method of (NH <sub>4</sub> )Ca(NO <sub>3</sub> ) <sub>3</sub> (H <sub>2</sub> O) <sub>2</sub> (a), RbCa(NO <sub>3</sub> ) <sub>3</sub> (H <sub>2</sub> O) <sub>2</sub> (b), and CsCa(NO <sub>3</sub> ) <sub>3</sub> (H <sub>2</sub> O) <sub>2</sub> (c).                                                                                                                                                                                                                                                                                                                                                                                    |
| Fig. S6   | Birefringence measurements of Rb <sub>2</sub> Ca(NO <sub>3</sub> ) <sub>2</sub> Cl <sub>2</sub> and Cs <sub>2</sub> Ca(NO <sub>3</sub> ) <sub>2</sub> Cl <sub>2</sub> using a polarizing microscope. Panels (a,b), (d,e) and (g,h) display the views of the crystals at extinction during negative and positive rotations of the compensator for (NH <sub>4</sub> )Ca(NO <sub>3</sub> ) <sub>3</sub> (H <sub>2</sub> O) <sub>2</sub> , RbCa(NO <sub>3</sub> ) <sub>3</sub> (H <sub>2</sub> O) <sub>2</sub> and CsCa(NO <sub>3</sub> ) <sub>3</sub> (H <sub>2</sub> O) <sub>2</sub> , respectively; panels (c), (f) and (i) show the thickness of the crystals used for measurement. |
| Fig. S7   | The response electron distribution anisotropy analysis (REDA) of (NH <sub>4</sub> )Ca(NO <sub>3</sub> ) <sub>3</sub> (H <sub>2</sub> O) <sub>2</sub> (a), RbCa(NO <sub>3</sub> ) <sub>3</sub> (H <sub>2</sub> O) <sub>2</sub> (b), and CsCa(NO <sub>3</sub> ) <sub>3</sub> (H <sub>2</sub> O) <sub>2</sub> (c).                                                                                                                                                                                                                                                                                                                                                                     |

**Table S1.** Crystallographic data and structure refinement for  $\text{ACa}(\text{NO}_3)_3 \cdot 2\text{H}_2\text{O}$  (A =  $\text{NH}_4$ , Rb, Cs).

| Molecular formula                                 | $(\text{NH}_4)\text{Ca}(\text{NO}_3)_3(\text{H}_2\text{O})_2$ | $\text{RbCa}(\text{NO}_3)_3(\text{H}_2\text{O})_2$       | $\text{CsCa}(\text{NO}_3)_3(\text{H}_2\text{O})_2$       |
|---------------------------------------------------|---------------------------------------------------------------|----------------------------------------------------------|----------------------------------------------------------|
| Formula weight                                    | 280.18                                                        | 347.61                                                   | 395.05                                                   |
| Temp./K                                           | 124.00                                                        | 124.00                                                   | 296.15                                                   |
| Crystal system                                    | triclinic                                                     | triclinic                                                | triclinic                                                |
| Space group                                       | $\bar{P}1$                                                    | $\bar{P}1$                                               | $\bar{P}1$                                               |
| a (Å)                                             | 6.4805(6)                                                     | 6.4588(4)                                                | 6.4566(14)                                               |
| b (Å)                                             | 7.4530(7)                                                     | 7.4518(4)                                                | 7.6617(16)                                               |
| c (Å)                                             | 10.4970(10)                                                   | 10.5548(7)                                               | 10.810(2)                                                |
| $\alpha$ (Å)                                      | 99.129(4)                                                     | 99.093(2)                                                | 98.414(6)                                                |
| $\beta$ (Å)                                       | 91.341(4)                                                     | 91.188(3)                                                | 92.822(7)                                                |
| $\gamma$ (Å)                                      | 91.711(4)                                                     | 92.350(3)                                                | 92.713(7)                                                |
| Volume (Å <sup>3</sup> )                          | 500.15(8)                                                     | 501.00(5)                                                | 527.55(19)                                               |
| Z                                                 | 2                                                             | 2                                                        | 2                                                        |
| Calculated density (g·cm <sup>-3</sup> )          | 1.860                                                         | 2.304                                                    | 2.487                                                    |
| Absorption coefficient ( $\mu/\text{mm}^{-1}$ )   | 0.692                                                         | 5.512                                                    | 4.052                                                    |
| F (000)                                           | 288.0                                                         | 340.0                                                    | 376.0                                                    |
| Radiation                                         | $\text{MoK}_\alpha$ ( $\lambda = 0.71073$ )                   | $\text{MoK}_\alpha$ ( $\lambda = 0.71073$ )              | $\text{MoK}_\alpha$ ( $\lambda = 0.71073$ )              |
| 2 $\theta$ range for data collection (°)          | 3.932 to 54.972                                               | 3.91 to 55.084                                           | 3.814 to 54.898                                          |
| Completeness (%)                                  | 99.0                                                          | 98.0                                                     | 99.3                                                     |
| Index ranges                                      | $-8 \leq h \leq 8, -9 \leq k \leq 9, -13 \leq l \leq 13$      | $-8 \leq h \leq 8, -9 \leq k \leq 9, -13 \leq l \leq 13$ | $-8 \leq h \leq 8, -9 \leq k \leq 9, -13 \leq l \leq 13$ |
| Reflections collected                             | 13413                                                         | 14228                                                    | 10045                                                    |
| Independent reflections                           | 2288 [ $R_{\text{int}} = 0.0462, R_\sigma = 0.0330$ ]         | 2278 [ $R_{\text{int}} = 0.0496, R_\sigma = 0.0376$ ]    | 2383 [ $R_{\text{int}} = 0.0390, R_\sigma = 0.0355$ ]    |
| Data / restraints / parameters                    | 2288/0/171                                                    | 2280/4/148                                               | 2383/0/148                                               |
| Goodness-of-fit on $F^2$                          | 1.091                                                         | 1.058                                                    | 1.100                                                    |
| Final R indices [ $I > 2\sigma(I)$ ] <sup>a</sup> | $R_1 = 0.0292, wR_2 = 0.0768$                                 | $R_1 = 0.0274, wR_2 = 0.0692$                            | $R_1 = 0.0232, wR_2 = 0.0567$                            |
| R indices (all data) <sup>a</sup>                 | $R_1 = 0.0311, wR_2 = 0.0786$                                 | $R_1 = 0.0290, wR_2 = 0.0703$                            | $R_1 = 0.0244, wR_2 = 0.0573$                            |
| Largest diff. peak/hole / e Å <sup>-3</sup>       | 0.76/-0.52                                                    | 0.55/-0.32                                               | 0.80/-0.38                                               |

<sup>a</sup> $R_1 = \sum ||F_o| - |F_c|| / \sum |F_o|$  and  $wR_2 = [\sum w(F_o^2 - F_c^2)^2 / \sum w F_o^4]^{1/2}$  for  $F_o^2 > 2\sigma(F_o^2)$ .

**Table S2.** Selected bond lengths (Å) and angles (°) for (NH<sub>4</sub>)Ca(NO<sub>3</sub>)<sub>3</sub>(H<sub>2</sub>O)<sub>2</sub>.

|              |            |            |            |
|--------------|------------|------------|------------|
| Ca(1)-O(2)   | 2.5372(12) | N(1)-O(2)  | 1.2662(17) |
| Ca(1)-O(3)   | 2.5076(12) | N(1)-O(3)  | 1.2645(17) |
| Ca(1)-O(4)   | 2.3697(12) | N(1)-O(1)  | 1.2064(18) |
| Ca(1)-O(9)   | 2.4699(13) | N(2)-O(6)  | 1.2345(18) |
| Ca(1)-O(7)#1 | 2.4552(13) | N(2)-O(7)  | 1.2427(18) |
| Ca(1)-O(10)  | 2.7178(15) | N(2)-O(8)  | 1.230(2)   |
| Ca(1)-O(5)   | 2.3497(13) | N(3)-O(9)  | 1.2542(18) |
| Ca(1)-O(6)   | 2.4000(12) | N(3)-O(10) | 1.2415(18) |
| Ca(1)-O(8)#1 | 2.8906(19) | N(3)-O(11) | 1.2316(18) |
| O(4)-H(4A)   | 0.8830     | N(4)-H(4C) | 0.81(4)    |
| O(4)-H(4B)   | 0.8824     | N(4)-H(4D) | 0.77(4)    |
| O(5)-H(5A)   | 0.83(3)    | N(4)-H(4E) | 0.92(4)    |
| O(5)-H(5B)   | 0.82(4)    | N(4)-H(4F) | 0.81(4)    |

|                     |           |                   |            |
|---------------------|-----------|-------------------|------------|
| O(2)-Ca(1)-O(10)    | 143.97(4) | O(5)-Ca(1)-O(10)  | 118.09(5)  |
| O(2)-Ca(1)-O(8)#1   | 113.33(4) | O(5)-Ca(1)-O(6)   | 96.63(6)   |
| O(3)-Ca(1)-O(2)     | 50.33(4)  | O(5)-Ca(1)-O(8)#1 | 80.59(6)   |
| O(3)-Ca(1)-O(10)    | 153.22(4) | O(6)-Ca(1)-O(2)   | 77.11(4)   |
| O(3)-Ca(1)-O(8)#1   | 64.95(4)  | O(6)-Ca(1)-O(3)   | 126.46(4)  |
| O(4)-Ca(1)-O(2)     | 78.46(4)  | O(6)-Ca(1)-O(9)   | 85.61(5)   |
| O(4)-Ca(1)-O(3)     | 81.93(4)  | O(6)-Ca(1)-O(7)#1 | 131.89(5)  |
| O(4)-Ca(1)-O(9)     | 129.78(5) | O(6)-Ca(1)-O(10)  | 69.63(5)   |
| O(4)-Ca(1)-O(7)#1   | 73.23(4)  | O(6)-Ca(1)-O(8)#1 | 168.11(5)  |
| O(4)-Ca(1)-O(10)    | 81.36(4)  | H(4A)-O(4)-H(4B)  | 103.8      |
| O(4)-Ca(1)-O(6)     | 77.88(5)  | O(3)-N(1)-O(2)    | 115.92(12) |
| O(4)-Ca(1)-O(8)#1   | 109.07(4) | O(1)-N(1)-O(2)    | 121.80(14) |
| O(9)-Ca(1)-O(2)     | 142.92(4) | O(1)-N(1)-O(3)    | 122.28(14) |
| O(9)-Ca(1)-O(3)     | 141.80(4) | H(5A)-O(5)-H(5B)  | 105(3)     |
| O(9)-Ca(1)-O(10)    | 48.49(4)  | O(10)-N(3)-O(9)   | 118.28(14) |
| O(9)-Ca(1)-O(8)#1   | 82.55(5)  | O(11)-N(3)-O(9)   | 119.59(14) |
| O(7)#1-Ca(1)-O(2)   | 131.23(5) | O(11)-N(3)-O(10)  | 122.13(14) |
| O(7)#1-Ca(1)-O(3)   | 86.55(4)  | O(6)-N(2)-O(7)    | 117.87(15) |
| O(7)#1-Ca(1)-O(9)   | 84.35(5)  | O(8)-N(2)-O(7)    | 117.68(15) |
| O(7)#1-Ca(1)-O(10)  | 68.64(5)  | O(8)-N(2)-O(6)    | 124.44(17) |
| O(7)#1-Ca(1)-O(8)#1 | 45.73(4)  | H(4C)-N(4)-H(4D)  | 110(4)     |
| O(10)-Ca(1)-O(8)#1  | 101.34(4) | H(4C)-N(4)-H(4E)  | 116(3)     |
| O(5)-Ca(1)-O(2)     | 78.48(5)  | H(4C)-N(4)-H(4F)  | 105(4)     |
| O(5)-Ca(1)-O(3)     | 83.65(5)  | H(4D)-N(4)-H(4E)  | 107(3)     |
| O(5)-Ca(1)-O(4)     | 156.94(6) | H(4D)-N(4)-H(4F)  | 109(4)     |
| O(5)-Ca(1)-O(9)     | 71.16(5)  | H(4E)-N(4)-H(4F)  | 109(3)     |
| O(5)-Ca(1)-O(7)#1   | 123.74(6) |                   |            |

Symmetrical transformations used to generate equivalent atoms:

#1 x + 1, y, z

**Table S3.** Bond lengths (Å) and angles (°) for RbCa(NO<sub>3</sub>)<sub>3</sub>(H<sub>2</sub>O)<sub>2</sub>.

|               |            |              |            |
|---------------|------------|--------------|------------|
| Rb(1)-O(10)#2 | 3.0179(16) | Ca(1)-O(6)   | 2.3920(16) |
| Rb(1)-O(9)#1  | 3.0209(16) | Ca(1)-O(8)#5 | 2.832(2)   |
| Rb(1)-O(3)#3  | 3.0986(17) | Ca(1)-O(5)   | 2.3512(17) |
| Rb(1)-O(7)#4  | 3.0471(18) | O(4)-H(4A)   | 0.8780     |
| Rb(1)-O(2)#4  | 3.2381(19) | O(4)-H(4B)   | 0.8784     |
| Rb(1)-O(11)   | 2.920(2)   | O(5)-H(5A)   | 0.830(10)  |
| Rb(1)-N(2)#4  | 3.4548(17) | O(5)-H(5B)   | 0.832(10)  |
| Rb(1)-O(6)#4  | 3.1412(18) | N(1)-O(1)    | 1.231(2)   |
| Rb(1)-O(1)#3  | 2.969(2)   | N(1)-O(2)    | 1.243(2)   |
| Rb(1)-O(8)#2  | 3.0629(19) | N(1)-O(3)    | 1.251(2)   |
| Ca(1)-O(10)   | 2.5280(15) | N(2)-O(6)    | 1.234(2)   |
| Ca(1)-O(9)    | 2.5026(15) | N(2)-O(7)    | 1.240(2)   |
| Ca(1)-O(3)    | 2.4686(16) | N(2)-O(8)    | 1.237(2)   |
| Ca(1)-O(4)    | 2.3627(16) | N(3)-O(9)    | 1.260(2)   |
| Ca(1)-O(7)#5  | 2.4528(16) | N(3)-O(10)   | 1.264(2)   |
| Ca(1)-O(2)    | 2.7294(19) | N(3)-O(11)   | 1.215(2)   |

|                      |           |                     |            |
|----------------------|-----------|---------------------|------------|
| O(10)#2-Rb(1)-O(9)#1 | 91.43(4)  | O(3)-Ca(1)-O(9)     | 142.22(6)  |
| O(10)#2-Rb(1)-O(3)#3 | 109.42(4) | O(3)-Ca(1)-O(2)     | 48.38(5)   |
| O(10)#2-Rb(1)-O(7)#4 | 139.89(5) | O(3)-Ca(1)-O(8)#5   | 81.78(6)   |
| O(10)#2-Rb(1)-O(2)#4 | 70.60(4)  | O(4)-Ca(1)-O(10)    | 78.08(6)   |
| O(10)#2-Rb(1)-O(6)#4 | 113.77(4) | O(4)-Ca(1)-O(9)     | 82.47(6)   |
| O(10)#2-Rb(1)-O(8)#2 | 66.40(5)  | O(4)-Ca(1)-O(3)     | 128.92(6)  |
| O(9)#1-Rb(1)-O(3)#3  | 105.99(4) | O(4)-Ca(1)-O(7)#5   | 73.01(6)   |
| O(9)#1-Rb(1)-O(7)#4  | 96.43(4)  | O(4)-Ca(1)-O(2)     | 80.64(6)   |
| O(9)#1-Rb(1)-O(2)#4  | 161.48(4) | O(4)-Ca(1)-O(6)     | 78.84(7)   |
| O(9)#1-Rb(1)-O(6)#4  | 134.54(4) | O(4)-Ca(1)-N(3)     | 78.21(6)   |
| O(9)#1-Rb(1)-O(8)#2  | 57.32(5)  | O(4)-Ca(1)-O(8)#5   | 110.01(6)  |
| O(3)#3-Rb(1)-O(2)#4  | 84.89(5)  | O(7)#5-Ca(1)-O(10)  | 131.79(6)  |
| O(3)#3-Rb(1)-O(6)#4  | 100.46(5) | O(7)#5-Ca(1)-O(9)   | 87.63(6)   |
| O(7)#4-Rb(1)-O(3)#3  | 106.01(5) | O(7)#5-Ca(1)-O(3)   | 83.72(6)   |
| O(7)#4-Rb(1)-O(2)#4  | 94.80(5)  | O(7)#5-Ca(1)-O(2)   | 68.56(6)   |
| O(7)#4-Rb(1)-O(6)#4  | 40.14(4)  | O(7)#5-Ca(1)-O(8)#5 | 46.59(6)   |
| O(7)#4-Rb(1)-O(8)#2  | 147.20(5) | O(2)-Ca(1)-O(8)#5   | 101.71(6)  |
| O(11)-Rb(1)-O(10)#2  | 77.73(5)  | O(6)-Ca(1)-O(10)    | 76.16(5)   |
| O(11)-Rb(1)-O(9)#1   | 71.39(5)  | O(6)-Ca(1)-O(9)     | 126.08(6)  |
| O(11)-Rb(1)-O(3)#3   | 172.63(5) | O(6)-Ca(1)-O(3)     | 85.06(7)   |
| O(11)-Rb(1)-O(7)#4   | 67.89(6)  | O(6)-Ca(1)-O(7)#5   | 132.29(6)  |
| O(11)-Rb(1)-O(2)#4   | 99.53(6)  | O(6)-Ca(1)-O(2)     | 69.45(6)   |
| O(11)-Rb(1)-O(6)#4   | 77.66(6)  | O(6)-Ca(1)-O(8)#5   | 166.83(7)  |
| O(11)-Rb(1)-O(1)#3   | 134.62(5) | O(5)-Ca(1)-O(10)    | 79.34(6)   |
| O(11)-Rb(1)-O(8)#2   | 114.32(6) | O(5)-Ca(1)-O(9)     | 84.23(6)   |
| O(6)#4-Rb(1)-O(2)#4  | 54.67(5)  | O(5)-Ca(1)-O(3)     | 71.12(6)   |
| O(1)#3-Rb(1)-O(10)#2 | 132.86(6) | O(5)-Ca(1)-O(4)     | 157.38(7)  |
| O(1)#3-Rb(1)-O(9)#1  | 127.32(6) | O(5)-Ca(1)-O(7)#5   | 124.63(7)  |
| O(1)#3-Rb(1)-O(3)#3  | 41.41(4)  | O(5)-Ca(1)-O(2)     | 117.55(6)  |
| O(1)#3-Rb(1)-O(7)#4  | 68.99(5)  | O(5)-Ca(1)-O(6)     | 94.53(8)   |
| O(1)#3-Rb(1)-O(2)#4  | 70.65(6)  | O(5)-Ca(1)-O(8)#5   | 80.75(7)   |
| O(1)#3-Rb(1)-O(6)#4  | 60.28(5)  | O(6)-N(2)-O(7)      | 118.42(19) |
| O(1)#3-Rb(1)-O(8)#2  | 109.42(5) | O(6)-N(2)-O(8)      | 124.0(2)   |
| O(8)#2-Rb(1)-O(3)#3  | 68.29(5)  | O(8)-N(2)-O(7)      | 117.60(18) |
| O(8)#2-Rb(1)-O(2)#4  | 116.04(6) | O(9)-N(3)-O(10)     | 116.65(16) |
| O(8)#2-Rb(1)-O(6)#4  | 167.04(6) | O(11)-N(3)-O(10)    | 121.37(19) |
| O(10)-Ca(1)-O(2)     | 142.35(5) | O(11)-N(3)-O(9)     | 121.98(19) |
| O(10)-Ca(1)-O(8)#5   | 114.63(5) | O(2)-N(1)-O(3)      | 118.53(18) |
| O(9)-Ca(1)-O(10)     | 50.53(5)  | O(1)-N(1)-O(3)      | 119.93(19) |
| O(9)-Ca(1)-O(2)      | 153.97(6) | O(1)-N(1)-O(2)      | 121.54(18) |
| O(9)-Ca(1)-O(8)#5    | 65.98(5)  | H(5A)-O(5)-H(5B)    | 106(2)     |

|                  |           |  |  |
|------------------|-----------|--|--|
| O(3)-Ca(1)-O(10) | 143.45(6) |  |  |
|------------------|-----------|--|--|

Symmetrical transformations used to generate equivalent atoms:

#1 -x + 2, -y + 2, -z + 1 #2 -x + 1, -y + 2, -z + 1 #3 x, y + 1, z + 1 #4 -x + 1, -y + 1, -z + 1 #5 x + 1, y, z

**Table S4.** Bond lengths (Å) and angles (°) for CsCa(NO<sub>3</sub>)<sub>3</sub>(H<sub>2</sub>O)<sub>2</sub>.

|               |            |               |            |
|---------------|------------|---------------|------------|
| Cs(1)-O(2)#1  | 3.1632(19) | Ca(1)-O(4)    | 2.3809(18) |
| Cs(1)-O(3)#2  | 3.196(2)   | Ca(1)-O(11)#6 | 2.759(3)   |
| Cs(1)-O(6)#3  | 3.345(2)   | Ca(1)-O(9)    | 2.3893(19) |
| Cs(1)-O(6)#4  | 3.656(2)   | O(4)-H(4A)    | 0.8708     |
| Cs(1)-O(8)#5  | 3.228(2)   | O(4)-H(4B)    | 0.8711     |
| Cs(1)-O(10)#3 | 3.206(2)   | O(5)-H(5A)    | 0.9150     |
| Cs(1)-O(11)#2 | 3.257(2)   | O(5)-H(5B)    | 0.9151     |
| Cs(1)-O(9)#3  | 3.281(2)   | N(1)-O(1)     | 1.214(3)   |
| Cs(1)-O(1)    | 3.118(2)   | N(1)-O(2)     | 1.254(3)   |
| Cs(1)-O(7)#5  | 3.159(3)   | N(1)-O(3)     | 1.265(3)   |
| Ca(1)-O(2)    | 2.4985(19) | N(2)-O(6)     | 1.243(3)   |
| Ca(1)-O(3)    | 2.5309(19) | N(2)-O(7)     | 1.233(3)   |
| Ca(1)-O(5)    | 2.3655(19) | N(2)-O(8)     | 1.254(3)   |
| Ca(1)-O(6)    | 2.683(2)   | N(3)-O(9)     | 1.227(3)   |
| Ca(1)-O(8)    | 2.479(2)   | N(3)-O(10)    | 1.237(3)   |
| Ca(1)-O(10)#6 | 2.467(2)   | N(3)-O(11)    | 1.241(3)   |

|                       |           |                       |           |
|-----------------------|-----------|-----------------------|-----------|
| O(2)#1-Cs(1)-O(3)#2   | 85.88(5)  | O(2)-Ca(1)-O(11)#6    | 70.16(6)  |
| O(2)#1-Cs(1)-O(6)#3   | 157.95(5) | O(3)-Ca(1)-O(6)       | 140.43(7) |
| O(2)#1-Cs(1)-O(6)#4   | 66.28(5)  | O(3)-Ca(1)-O(11)#6    | 117.89(7) |
| O(2)#1-Cs(1)-O(8)#5   | 107.77(5) | O(5)-Ca(1)-O(2)       | 83.65(8)  |
| O(2)#1-Cs(1)-O(10)#3  | 100.99(5) | O(5)-Ca(1)-O(3)       | 77.35(7)  |
| O(2)#1-Cs(1)-O(11)#2  | 56.28(5)  | O(5)-Ca(1)-O(6)       | 76.42(7)  |
| O(2)#1-Cs(1)-O(9)#3   | 138.73(5) | O(5)-Ca(1)-O(8)       | 125.20(8) |
| O(3)#2-Cs(1)-O(6)#4   | 152.10(5) | O(5)-Ca(1)-O(10)#6    | 73.69(7)  |
| O(3)#2-Cs(1)-O(6)#3   | 72.92(5)  | O(5)-Ca(1)-O(4)       | 157.44(8) |
| O(3)#2-Cs(1)-O(8)#5   | 106.11(5) | O(5)-Ca(1)-O(11)#6    | 116.13(7) |
| O(3)#2-Cs(1)-O(10)#3  | 139.69(6) | O(5)-Ca(1)-O(9)       | 82.54(9)  |
| O(3)#2-Cs(1)-O(11)#2  | 64.77(6)  | O(6)-Ca(1)-O(11)#6    | 100.17(7) |
| O(3)#2-Cs(1)-O(9)#3   | 119.82(5) | O(8)-Ca(1)-O(2)       | 144.49(7) |
| O(6)#3-Cs(1)-O(6)#4   | 134.45(6) | O(8)-Ca(1)-O(3)       | 145.87(7) |
| O(8)#5-Cs(1)-O(6)#4   | 85.18(5)  | O(8)-Ca(1)-O(6)       | 48.81(6)  |
| O(8)#5-Cs(1)-O(6)#3   | 84.46(5)  | O(8)-Ca(1)-O(11)#6    | 77.77(7)  |
| O(8)#5-Cs(1)-O(11)#2  | 66.02(5)  | O(10)#6-Ca(1)-O(2)    | 84.01(7)  |
| O(8)#5-Cs(1)-O(9)#3   | 95.95(6)  | O(10)#6-Ca(1)-O(3)    | 128.12(7) |
| O(10)#3-Cs(1)-O(6)#4  | 50.99(5)  | O(10)#6-Ca(1)-O(6)    | 70.61(7)  |
| O(10)#3-Cs(1)-O(6)#3  | 91.72(5)  | O(10)#6-Ca(1)-O(8)    | 85.32(8)  |
| O(10)#3-Cs(1)-O(8)#5  | 109.24(6) | O(10)#6-Ca(1)-O(11)#6 | 47.26(7)  |
| O(10)#3-Cs(1)-O(11)#2 | 149.56(6) | O(4)-Ca(1)-O(2)       | 84.43(7)  |
| O(10)#3-Cs(1)-O(9)#3  | 38.26(5)  | O(4)-Ca(1)-O(3)       | 80.28(8)  |
| O(11)#2-Cs(1)-O(6)#3  | 116.73(6) | O(4)-Ca(1)-O(6)       | 120.84(7) |
| O(11)#2-Cs(1)-O(6)#4  | 98.82(5)  | O(4)-Ca(1)-O(8)       | 73.82(7)  |
| O(11)#2-Cs(1)-O(9)#3  | 161.47(7) | O(4)-Ca(1)-O(10)#6    | 123.90(8) |
| O(9)#3-Cs(1)-O(6)#4   | 83.16(5)  | O(4)-Ca(1)-O(11)#6    | 77.26(8)  |
| O(9)#3-Cs(1)-O(6)#3   | 54.13(5)  | O(4)-Ca(1)-O(9)       | 88.90(9)  |
| O(1)-Cs(1)-O(2)#1     | 73.83(7)  | O(9)-Ca(1)-O(2)       | 125.42(7) |
| O(1)-Cs(1)-O(3)#2     | 80.63(6)  | O(9)-Ca(1)-O(3)       | 74.97(7)  |
| O(1)-Cs(1)-O(6)#3     | 96.28(7)  | O(9)-Ca(1)-O(6)       | 72.69(7)  |
| O(1)-Cs(1)-O(6)#4     | 89.44(7)  | O(9)-Ca(1)-O(8)       | 82.60(8)  |
| O(1)-Cs(1)-O(8)#5     | 173.08(6) | O(9)-Ca(1)-O(10)#6    | 139.88(8) |
| O(1)-Cs(1)-O(10)#3    | 63.89(7)  | O(9)-Ca(1)-O(11)#6    | 158.46(9) |
| O(1)-Cs(1)-O(11)#2    | 119.27(7) | H(5A)-O(5)-H(5B)      | 104.5     |

|                      |           |                  |            |
|----------------------|-----------|------------------|------------|
| O(1)-Cs(1)-O(9)#3    | 79.05(7)  | H(4A)-O(4)-H(4B) | 103.3      |
| O(1)-Cs(1)-O(7)#5    | 134.43(6) | O(2)-N(1)-O(3)   | 116.7(2)   |
| O(7)#5-Cs(1)-O(2)#1  | 130.17(7) | O(1)-N(1)-O(2)   | 122.4(2)   |
| O(7)#5-Cs(1)-O(3)#2  | 131.17(7) | O(1)-N(1)-O(3)   | 120.9(2)   |
| O(7)#5-Cs(1)-O(6)#3  | 70.75(7)  | N(3)-O(9)-Ca(1)  | 144.05(17) |
| O(7)#5-Cs(1)-O(6)#4  | 73.26(7)  | O(10)-N(3)-O(11) | 116.9(2)   |
| O(7)#5-Cs(1)-O(8)#5  | 39.48(5)  | O(9)-N(3)-O(10)  | 119.3(2)   |
| O(7)#5-Cs(1)-O(10)#3 | 72.81(6)  | O(9)-N(3)-O(11)  | 123.7(2)   |
| O(7)#5-Cs(1)-O(11)#2 | 105.10(6) | O(6)-N(2)-O(8)   | 118.0(2)   |
| O(7)#5-Cs(1)-O(9)#3  | 57.62(6)  | O(7)-N(2)-O(6)   | 121.6(2)   |
| O(2)-Ca(1)-O(3)      | 50.49(6)  | O(7)-N(2)-O(8)   | 120.4(2)   |
| O(2)-Ca(1)-O(6)      | 151.17(7) |                  |            |

Symmetrical transformations used to generate equivalent atoms:

#1 -x + 2, -y + 2, -z + 1                      #2 -x + 1, -y + 2, -z + 1                      #3 -x + 1, -y + 1, -z + 1                      #4 -x + 2, -y + 1, -z + 1  
#5 x, y + 1, z + 1                      #6 x + 1, y, z

**Table S5.** Atomic coordinates ( $\times 10^4$ ), equivalent isotropic displacement parameters ( $\text{\AA}^2 \times 10^3$ ), and bond valence sum (BVS) calculations for  $(\text{NH}_4)\text{Ca}(\text{NO}_3)_3(\text{H}_2\text{O})_2$ .

| Atom  | x       | y       | z       | U(eq) | BVS    |
|-------|---------|---------|---------|-------|--------|
| Ca(1) | 7596(1) | 4262(1) | 2502(1) | 25(1) | 2.19   |
| N(1)  | 7492(2) | 7924(2) | 4057(1) | 31(1) | 4.98   |
| N(2)  | 2309(2) | 3725(2) | 2481(1) | 33(1) | 5.10   |
| N(3)  | 7489(2) | 658(2)  | 752(1)  | 34(1) | 5.01   |
| N(4)  | 2593(3) | 9095(2) | 2502(2) | 43(1) | - *    |
| O(1)  | 7468(3) | 9379(2) | 4748(2) | 58(1) | 1.84   |
| O(2)  | 5845(2) | 7028(2) | 3667(1) | 38(1) | 1.78   |
| O(3)  | 9155(2) | 7201(2) | 3675(1) | 38(1) | 1.80   |
| O(4)  | 7453(2) | 3579(2) | 4628(1) | 41(1) | 0.34 # |
| O(5)  | 7071(3) | 5956(2) | 822(1)  | 60(1) | 0.36 # |
| O(6)  | 4080(2) | 3192(2) | 2589(2) | 56(1) | 2.02   |
| O(7)  | 888(2)  | 2905(2) | 2948(2) | 49(1) | 1.93   |
| O(8)  | 1848(3) | 4992(2) | 1920(2) | 64(1) | 1.81   |
| O(9)  | 7663(2) | 2196(2) | 417(1)  | 44(1) | 1.88   |
| O(10) | 7328(2) | 576(2)  | 1918(1) | 48(1) | 1.80   |
| O(11) | 7467(3) | -715(2) | -75(1)  | 61(1) | 1.72   |

U<sub>eq</sub> is defined as one-third of the trace of the orthogonalized U<sub>ij</sub> tensor. \* is N in NH<sub>4</sub> # is O in H<sub>2</sub>O

**Table S6.** Atomic coordinates ( $\times 10^4$ ), equivalent isotropic displacement parameters ( $\text{\AA}^2 \times 10^3$ ), and BVS calculations for  $\text{RbCa}(\text{NO}_3)_3(\text{H}_2\text{O})_2$ .

| Atom  | x       | y        | z       | U(eq) | BVS    |
|-------|---------|----------|---------|-------|--------|
| Rb(1) | 7322(1) | 10866(1) | 7494(1) | 41(1) | 1.08   |
| Ca(1) | 7629(1) | 4282(1)  | 2497(1) | 24(1) | 2.21   |
| N(1)  | 7495(3) | 685(2)   | 742(2)  | 33(1) | 5.02   |
| N(2)  | 2298(3) | 3733(2)  | 2454(2) | 31(1) | 5.10   |
| N(3)  | 7494(3) | 7891(2)  | 4072(2) | 31(1) | 4.97   |
| O(1)  | 7465(4) | -684(2)  | -82(2)  | 58(1) | 1.88   |
| O(2)  | 7291(3) | 580(2)   | 1897(2) | 47(1) | 1.87   |
| O(3)  | 7709(3) | 2227(2)  | 423(2)  | 43(1) | 1.98   |
| O(4)  | 7450(2) | 3539(2)  | 4589(2) | 43(1) | 0.34 # |
| O(5)  | 7084(4) | 5975(2)  | 829(2)  | 55(1) | 0.35 # |
| O(6)  | 4085(2) | 3224(2)  | 2526(2) | 54(1) | 2.12   |
| O(7)  | 895(2)  | 2898(2)  | 2935(2) | 48(1) | 2.07   |
| O(8)  | 1807(4) | 5012(2)  | 1908(2) | 57(1) | 1.91   |
| O(9)  | 9170(2) | 7221(2)  | 3685(2) | 38(1) | 1.96   |
| O(10) | 5846(2) | 6980(2)  | 3685(2) | 38(1) | 1.92   |
| O(11) | 7452(3) | 9348(3)  | 4773(2) | 59(1) | 1.97   |

$U_{\text{eq}}$  is defined as one-third of the trace of the orthogonalized  $U_{ij}$  tensor. # is O in  $\text{H}_2\text{O}$

**Table S7.** Atomic coordinates ( $\times 10^4$ ), equivalent isotropic displacement parameters ( $\text{\AA}^2 \times 10^3$ ), and BVS calculations for  $\text{CsCa}(\text{NO}_3)_3(\text{H}_2\text{O})_2$ .

| Atom  | x       | y        | z       | U(eq) | BVS    |
|-------|---------|----------|---------|-------|--------|
| Cs(1) | 7395(1) | 10825(1) | 7506(1) | 42(1) | 1.09   |
| Ca(1) | 7617(1) | 4227(1)  | 2484(1) | 26(1) | 2.22   |
| N(1)  | 7440(3) | 7673(3)  | 4060(2) | 37(1) | 4.99   |
| N(2)  | 7535(4) | 718(3)   | 846(2)  | 40(1) | 4.99   |
| N(3)  | 2251(3) | 3800(3)  | 2354(2) | 35(1) | 5.11   |
| O(1)  | 7368(5) | 9102(3)  | 4707(2) | 71(1) | 1.95   |
| O(2)  | 9118(3) | 7059(3)  | 3713(2) | 44(1) | 1.99   |
| O(3)  | 5797(3) | 6737(3)  | 3689(2) | 48(1) | 1.91   |
| O(4)  | 7012(4) | 5970(3)  | 864(2)  | 54(1) | 0.33 # |
| O(5)  | 7391(3) | 3342(3)  | 4482(2) | 52(1) | 0.34 # |
| O(6)  | 7387(4) | 686(3)   | 1986(2) | 53(1) | 1.92   |
| O(7)  | 7487(6) | -653(3)  | 86(2)   | 76(1) | 1.85   |
| O(8)  | 7705(4) | 2196(2)  | 482(2)  | 50(1) | 1.98   |
| O(9)  | 4019(3) | 3287(3)  | 2285(3) | 64(1) | 2.16   |
| O(10) | 1022(3) | 3105(3)  | 3004(2) | 56(1) | 2.07   |
| O(11) | 1569(4) | 4938(3)  | 1759(2) | 59(1) | 1.90   |

$U_{\text{eq}}$  is defined as one-third of the trace of the orthogonalized  $U_{ij}$  tensor. # is O in  $\text{H}_2\text{O}$

**Table S8.** Anisotropic displacement parameters ( $\text{\AA}^2 \times 10^3$ ) for  $(\text{NH}_4)\text{Ca}(\text{NO}_3)_3(\text{H}_2\text{O})_2$ .

| Atom  | $U_{11}$ | $U_{22}$ | $U_{33}$ | $U_{23}$ | $U_{13}$ | $U_{12}$ |
|-------|----------|----------|----------|----------|----------|----------|
| Ca(1) | 25(1)    | 26(1)    | 25(1)    | 6(1)     | 1(1)     | 2(1)     |
| N(1)  | 34(1)    | 31(1)    | 28(1)    | 4(1)     | 2(1)     | 2(1)     |
| N(2)  | 31(1)    | 29(1)    | 36(1)    | -2(1)    | 2(1)     | 2(1)     |
| N(3)  | 42(1)    | 26(1)    | 33(1)    | 4(1)     | -1(1)    | 0(1)     |
| N(4)  | 56(1)    | 36(1)    | 37(1)    | 10(1)    | 3(1)     | 2(1)     |
| O(1)  | 70(1)    | 40(1)    | 56(1)    | -15(1)   | 3(1)     | 4(1)     |
| O(2)  | 27(1)    | 40(1)    | 46(1)    | 3(1)     | 3(1)     | 2(1)     |
| O(3)  | 27(1)    | 40(1)    | 44(1)    | 2(1)     | 3(1)     | 1(1)     |
| O(4)  | 33(1)    | 60(1)    | 36(1)    | 21(1)    | 4(1)     | 4(1)     |
| O(5)  | 117(1)   | 30(1)    | 35(1)    | 13(1)    | -4(1)    | 3(1)     |
| O(6)  | 22(1)    | 52(1)    | 89(1)    | -6(1)    | 4(1)     | 1(1)     |
| O(7)  | 28(1)    | 50(1)    | 71(1)    | 14(1)    | 10(1)    | 2(1)     |
| O(8)  | 106(1)   | 40(1)    | 51(1)    | 13(1)    | 15(1)    | 20(1)    |
| O(9)  | 67(1)    | 24(1)    | 41(1)    | 6(1)     | 2(1)     | 1(1)     |
| O(10) | 61(1)    | 51(1)    | 34(1)    | 12(1)    | 2(1)     | -1(1)    |
| O(11) | 109(1)   | 26(1)    | 45(1)    | -4(1)    | 2(1)     | -1(1)    |

The anisotropic displacement factor exponent takes the form:  $-2\pi^2 [ h^2 a^{*2} U_{11} + \dots + 2 h k a^* b^* U_{12} ]$

**Table S9.** Anisotropic displacement parameters ( $\text{\AA}^2 \times 10^3$ ) for  $\text{RbCa}(\text{NO}_3)_3(\text{H}_2\text{O})_2$ .

| Atom  | $U_{11}$ | $U_{22}$ | $U_{33}$ | $U_{23}$ | $U_{13}$ | $U_{12}$ |
|-------|----------|----------|----------|----------|----------|----------|
| Rb(1) | 57(1)    | 32(1)    | 37(1)    | 10(1)    | 5(1)     | 1(1)     |
| Ca(1) | 24(1)    | 25(1)    | 26(1)    | 5(1)     | 2(1)     | 2(1)     |
| N(1)  | 38(1)    | 26(1)    | 34(1)    | 4(1)     | -1(1)    | 2(1)     |
| N(2)  | 28(1)    | 28(1)    | 36(1)    | -2(1)    | 2(1)     | 2(1)     |
| N(3)  | 36(1)    | 30(1)    | 27(1)    | 4(1)     | 2(1)     | 4(1)     |
| O(1)  | 106(2)   | 23(1)    | 44(1)    | -2(1)    | 0(1)     | 0(1)     |
| O(2)  | 60(1)    | 51(1)    | 33(1)    | 12(1)    | 3(1)     | -2(1)    |
| O(3)  | 67(1)    | 22(1)    | 40(1)    | 6(1)     | 3(1)     | 2(1)     |
| O(4)  | 31(1)    | 62(1)    | 40(1)    | 26(1)    | 5(1)     | 7(1)     |
| O(5)  | 105(2)   | 28(1)    | 34(1)    | 12(1)    | -2(1)    | 2(1)     |
| O(6)  | 22(1)    | 43(1)    | 92(2)    | -4(1)    | 4(1)     | 0(1)     |
| O(7)  | 27(1)    | 52(1)    | 68(1)    | 18(1)    | 9(1)     | 3(1)     |
| O(8)  | 84(1)    | 36(1)    | 52(1)    | 11(1)    | 11(1)    | 15(1)    |
| O(9)  | 28(1)    | 40(1)    | 43(1)    | 1(1)     | 3(1)     | 0(1)     |
| O(10) | 27(1)    | 40(1)    | 46(1)    | 2(1)     | 3(1)     | 2(1)     |
| O(11) | 74(1)    | 41(1)    | 56(1)    | -16(1)   | 3(1)     | 6(1)     |

The anisotropic displacement factor exponent takes the form:  $-2\pi^2 [ h^2 a^{*2} U_{11} + \dots + 2 h k a^* b^* U_{12} ]$

**Table S10.** Anisotropic displacement parameters ( $\text{\AA}^2 \times 10^3$ ) for  $\text{CsCa}(\text{NO}_3)_3(\text{H}_2\text{O})_2$ .

| Atom  | $U_{11}$ | $U_{22}$ | $U_{33}$ | $U_{23}$ | $U_{13}$ | $U_{12}$ |
|-------|----------|----------|----------|----------|----------|----------|
| Cs(1) | 55(1)    | 32(1)    | 40(1)    | 11(1)    | 7(1)     | 2(1)     |
| Ca(1) | 24(1)    | 29(1)    | 28(1)    | 7(1)     | 3(1)     | 4(1)     |
| N(1)  | 47(1)    | 36(1)    | 28(1)    | 4(1)     | 6(1)     | 8(1)     |
| N(2)  | 50(1)    | 31(1)    | 37(1)    | 5(1)     | 1(1)     | 1(1)     |
| N(3)  | 27(1)    | 29(1)    | 47(1)    | -3(1)    | 3(1)     | 1(1)     |
| O(1)  | 102(2)   | 49(1)    | 57(1)    | -14(1)   | 12(1)    | 13(1)    |
| O(2)  | 35(1)    | 49(1)    | 46(1)    | 2(1)     | 5(1)     | -1(1)    |
| O(3)  | 33(1)    | 52(1)    | 57(1)    | 2(1)     | 7(1)     | 8(1)     |
| O(4)  | 90(2)    | 33(1)    | 38(1)    | 15(1)    | -3(1)    | -1(1)    |
| O(5)  | 40(1)    | 82(2)    | 44(1)    | 33(1)    | 11(1)    | 16(1)    |
| O(6)  | 68(1)    | 55(1)    | 38(1)    | 13(1)    | 7(1)     | 4(1)     |
| O(7)  | 150(3)   | 27(1)    | 50(1)    | 3(1)     | 7(1)     | -1(1)    |
| O(8)  | 80(1)    | 26(1)    | 44(1)    | 6(1)     | 8(1)     | 2(1)     |
| O(9)  | 25(1)    | 45(1)    | 118(2)   | -10(1)   | 12(1)    | -1(1)    |
| O(10) | 40(1)    | 61(1)    | 76(2)    | 29(1)    | 18(1)    | 13(1)    |
| O(11) | 79(2)    | 42(1)    | 61(1)    | 16(1)    | 17(1)    | 15(1)    |

The anisotropic displacement factor exponent takes the form:  $-2\pi^2 [ h^2 a^{*2} U_{11} + \dots + 2 h k a^* b^* U_{12} ]$

**Table S11.** Hydrogen coordinates ( $\times 10^4$ ) and isotropic displacement parameters ( $\text{\AA}^2 \times 10^3$ ) for  $(\text{NH}_4)\text{Ca}(\text{NO}_3)_3(\text{H}_2\text{O})_2$ .

| Atom  | x        | y         | z        | U(eq)   |
|-------|----------|-----------|----------|---------|
| H(4A) | 8483     | 2884      | 4776     | 62      |
| H(4B) | 6341     | 2895      | 4703     | 62      |
| H(4C) | 3650(60) | 8670(50)  | 2740(40) | 113(13) |
| H(4D) | 2480(50) | 8880(50)  | 1760(40) | 105(12) |
| H(4E) | 1390(60) | 8700(50)  | 2840(40) | 116(13) |
| H(4F) | 2740(60) | 10180(60) | 2720(40) | 129(15) |
| H(5A) | 7310(50) | 7040(50)  | 740(30)  | 90(10)  |
| H(5B) | 7120(50) | 5380(50)  | 90(30)   | 98(11)  |

**Table S12.** Hydrogen coordinates ( $\times 10^4$ ) and isotropic displacement parameters ( $\text{\AA}^2 \times 10^3$ ) for  $\text{RbCa}(\text{NO}_3)_3(\text{H}_2\text{O})_2$ .

| Atom  | x        | y        | z       | U(eq)   |
|-------|----------|----------|---------|---------|
| H(4A) | 8471     | 2846     | 4727    | 64      |
| H(4B) | 6329     | 2852     | 4646    | 64      |
| H(5A) | 7270(60) | 7072(17) | 790(30) | 87(12)  |
| H(5B) | 7130(80) | 5430(50) | 82(18)  | 118(18) |

**Table S13.** Hydrogen coordinates ( $\times 10^4$ ) and isotropic displacement parameters ( $\text{\AA}^2 \times 10^3$ ) for  $\text{CsCa}(\text{NO}_3)_3(\text{H}_2\text{O})_2$ .

| Atom  | x    | y    | z    | U(eq) |
|-------|------|------|------|-------|
| H(4A) | 7639 | 5546 | 200  | 80    |
| H(4B) | 7598 | 7028 | 1070 | 80    |
| H(5A) | 6248 | 3317 | 4949 | 79    |
| H(5B) | 8426 | 2947 | 4962 | 79    |

**Table S14.** Hydrogen bonds for  $(\text{NH}_4)\text{Ca}(\text{NO}_3)_3(\text{H}_2\text{O})_2$  (Å and °).

| D-H...A              | d(D-H)  | d(H...A) | d(D...A)   | <(DHA) |
|----------------------|---------|----------|------------|--------|
| O(4)-H(4A)...O(3)#3  | 0.88    | 2.22     | 2.9266(16) | 137.3  |
| O(4)-H(4A)...O(7)#1  | 0.88    | 2.50     | 2.8787(17) | 106.4  |
| O(4)-H(4A)...O(1)#4  | 0.88    | 2.67     | 3.153(2)   | 115.5  |
| O(4)-H(4B)...O(2)#5  | 0.88    | 2.24     | 2.8904(16) | 130.1  |
| O(4)-H(4B)...O(6)    | 0.88    | 2.67     | 2.9979(19) | 103.1  |
| N(4)-H(4C)...O(2)    | 0.81(4) | 2.21(4)  | 2.997(2)   | 163(4) |
| N(4)-H(4D)...O(9)#6  | 0.77(4) | 2.30(4)  | 3.062(2)   | 171(4) |
| N(4)-H(4D)...O(11)#6 | 0.77(4) | 2.40(4)  | 2.987(2)   | 134(4) |
| N(4)-H(4E)...O(3)#2  | 0.92(4) | 2.10(4)  | 2.994(2)   | 164(3) |
| N(4)-H(4E)...O(8)    | 0.92(4) | 2.81(4)  | 3.044(2)   | 96(3)  |
| N(4)-H(4F)...O(7)#7  | 0.81(4) | 2.37(4)  | 3.048(2)   | 142(4) |
| N(4)-H(4F)...O(6)#7  | 0.81(4) | 2.41(5)  | 3.161(2)   | 155(4) |
| N(4)-H(4F)...O(1)#8  | 0.81(4) | 2.63(4)  | 2.931(2)   | 104(3) |
| O(5)-H(5A)...O(11)#7 | 0.83(3) | 2.00(3)  | 2.7970(19) | 159(3) |
| O(5)-H(5B)...O(9)    | 0.82(4) | 2.49(4)  | 2.8061(19) | 104(3) |
| O(5)-H(5B)...O(8)#6  | 0.82(4) | 2.20(4)  | 2.959(2)   | 153(3) |

Symmetrical transformations used to generate equivalent atoms:

#1  $x+1,y,z$       #2  $x-1,y,z$       #3  $-x+2,-y+1,-z+1$       #4  $x,y-1,z$   
 #5  $-x+1,-y+1,-z+1$       #6  $-x+1,-y+1,-z$       #7  $x,y+1,z$       #8  $-x+1,-y+2,-z+1$

**Table S15.** Hydrogen bonds for  $\text{RbCa}(\text{NO}_3)_3(\text{H}_2\text{O})_2$  (Å and °).

| D-H...A              | d(D-H) | d(H...A) | d(D...A) | <(DHA) |
|----------------------|--------|----------|----------|--------|
| O(4)-H(4A)...O(9)#8  | 0.88   | 2.25     | 2.944(2) | 136.0  |
| O(4)-H(4A)...O(7)#5  | 0.88   | 2.48     | 2.866(2) | 106.9  |
| O(4)-H(4A)...O(11)#9 | 0.88   | 2.67     | 3.160(3) | 116.4  |
| O(4)-H(4B)...O(10)#4 | 0.88   | 2.27     | 2.884(2) | 127.2  |
| O(4)-H(4B)...O(6)    | 0.88   | 2.70     | 3.019(2) | 103.0  |

Symmetrical transformations used to generate equivalent atoms:

#4  $-x+1,-y+1,-z+1$       #5  $x+1,y,z$       #8  $-x+2,-y+1,-z+1$       #9  $x,y-1,z$

**Table S16.** Hydrogen bonds for  $\text{CsCa}(\text{NO}_3)_3(\text{H}_2\text{O})_2$  (Å and °).

| D-H...A              | d(D-H) | d(H...A) | d(D...A) | <(DHA) |
|----------------------|--------|----------|----------|--------|
| O(4)-H(4A)...O(8)    | 0.87   | 2.63     | 2.920(3) | 100.6  |
| O(4)-H(4A)...O(11)#9 | 0.87   | 2.19     | 3.018(3) | 159.6  |
| O(4)-H(4B)...O(7)#10 | 0.87   | 2.20     | 2.843(3) | 130.1  |
| O(5)-H(5A)...O(3)#3  | 0.92   | 2.03     | 2.928(3) | 166.9  |
| O(5)-H(5B)...O(2)#4  | 0.92   | 2.08     | 2.965(3) | 160.9  |

Symmetrical transformations used to generate equivalent atoms:

#3  $-x+1,-y+1,-z+1$       #4  $-x+2,-y+1,-z+1$       #8  $x-1,y,z$       #9  $-x+1,-y+1,-z$       #10  $x,y+1,z$

**Table 17.** The birefringence of  $A\text{Ca}(\text{NO}_3)_3 \cdot 2\text{H}_2\text{O}$  ( $A = \text{NH}_4, \text{Rb}, \text{Cs}$ ) at the wavelength of 546 nm with polarizing microscope.

| Compound                                                      | Optical path difference R (nm) | Thickness ( $\mu\text{m}$ ) | Birefringence ( $\Delta n$ ) |
|---------------------------------------------------------------|--------------------------------|-----------------------------|------------------------------|
| $(\text{NH}_4)\text{Ca}(\text{NO}_3)_3(\text{H}_2\text{O})_2$ | 1555.21                        | 18.90                       | 0.082                        |
| $\text{RbCa}(\text{NO}_3)_3(\text{H}_2\text{O})_2$            | 1309.46                        | 15.26                       | 0.086                        |
| $\text{CsCa}(\text{NO}_3)_3(\text{H}_2\text{O})_2$            | 2504.9                         | 29.7                        | 0.084                        |

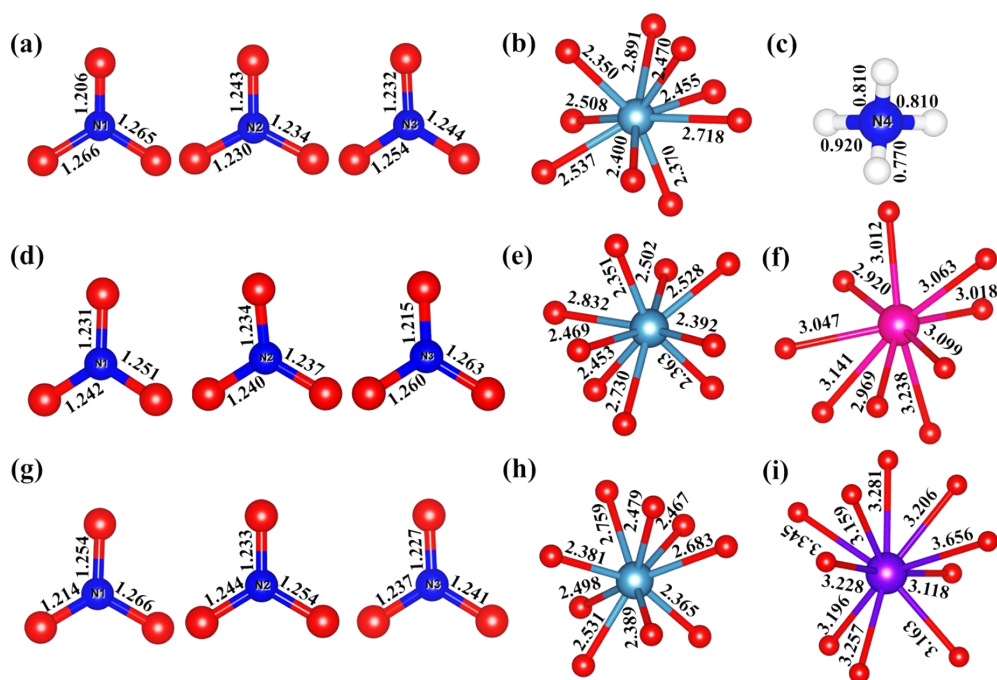

**Fig. S1.** The coordination modes of  $\text{N}^{5+}$  (1–3) (a,d,g),  $\text{Ca}^{2+}$  (1) (b,e,h), and  $\text{N}^{3+}$ (4) (c)/  $\text{Rb}^+$  (f)/  $\text{Cs}^+$  (i) in  $(\text{NH}_4)\text{Ca}(\text{NO}_3)_3(\text{H}_2\text{O})_2$ ,  $\text{RbCa}(\text{NO}_3)_3(\text{H}_2\text{O})_2$ , and  $\text{CsCa}(\text{NO}_3)_3(\text{H}_2\text{O})_2$ , respectively.

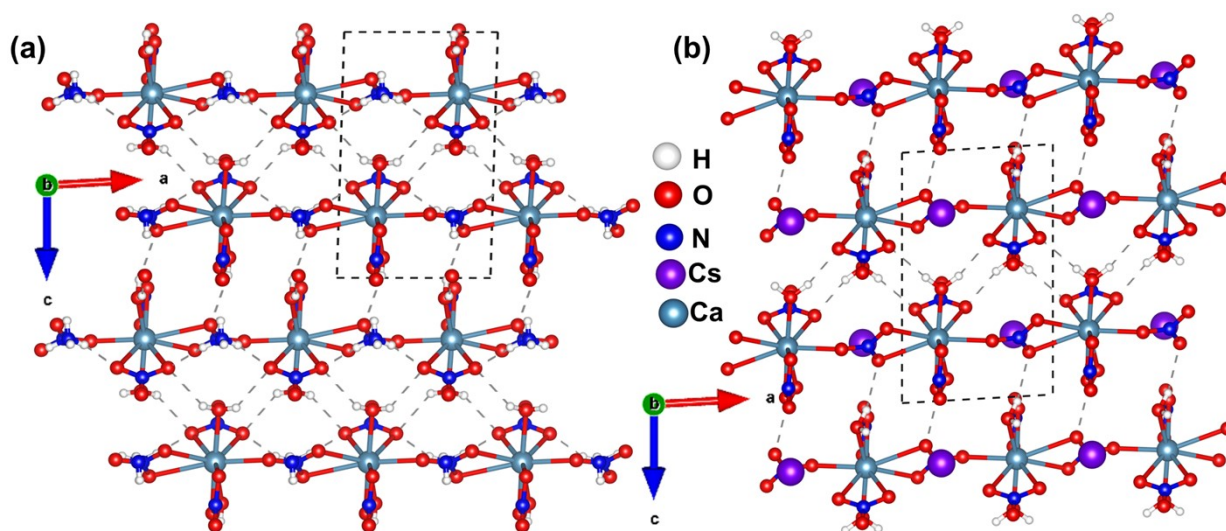

**Fig. S2.** Ball-and-stick models of  $(\text{NH}_4)\text{Ca}(\text{NO}_3)_3(\text{H}_2\text{O})_2$  (a) and  $\text{CsCa}(\text{NO}_3)_3(\text{H}_2\text{O})_2$  (b).

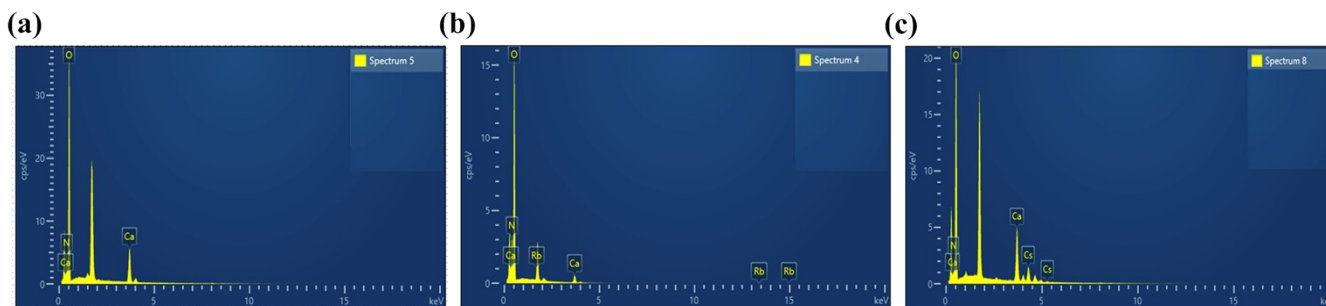

Fig. S3. EDS for  $(\text{NH}_4)\text{Ca}(\text{NO}_3)_3(\text{H}_2\text{O})_2$  (a),  $\text{RbCa}(\text{NO}_3)_3(\text{H}_2\text{O})_2$  (b), and  $\text{CsCa}(\text{NO}_3)_3(\text{H}_2\text{O})_2$  (c).

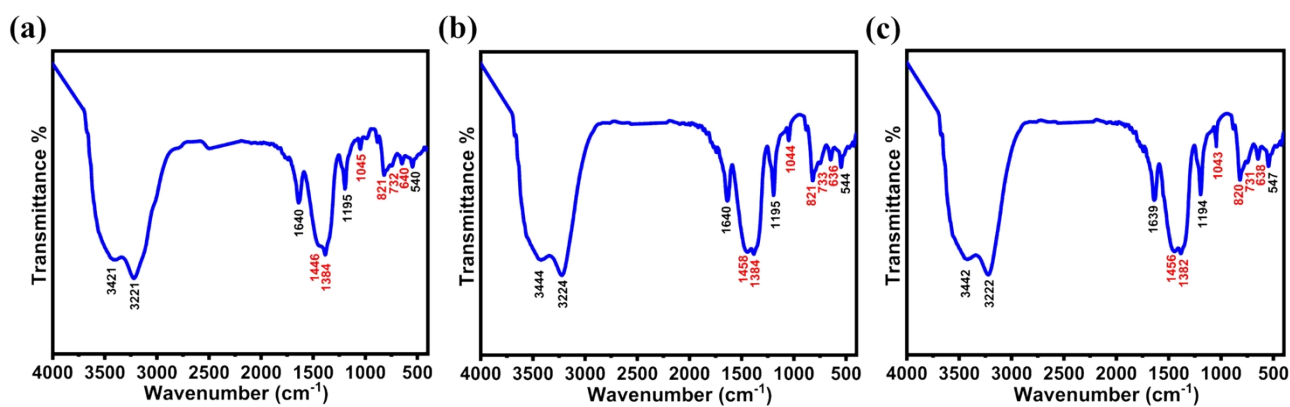

Fig. S4. IR spectra of  $(\text{NH}_4)\text{Ca}(\text{NO}_3)_3(\text{H}_2\text{O})_2$  (a),  $\text{RbCa}(\text{NO}_3)_3(\text{H}_2\text{O})_2$  (b), and  $\text{CsCa}(\text{NO}_3)_3(\text{H}_2\text{O})_2$  (c).

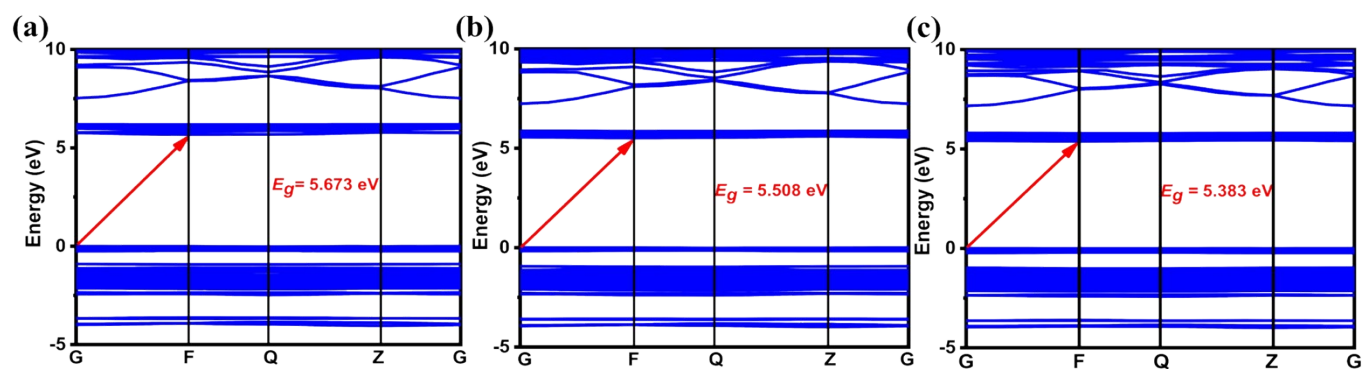

Fig. S5. Calculated band structures by the HSE06 method of  $(\text{NH}_4)\text{Ca}(\text{NO}_3)_3(\text{H}_2\text{O})_2$  (a),  $\text{RbCa}(\text{NO}_3)_3(\text{H}_2\text{O})_2$  (b), and  $\text{CsCa}(\text{NO}_3)_3(\text{H}_2\text{O})_2$  (c).

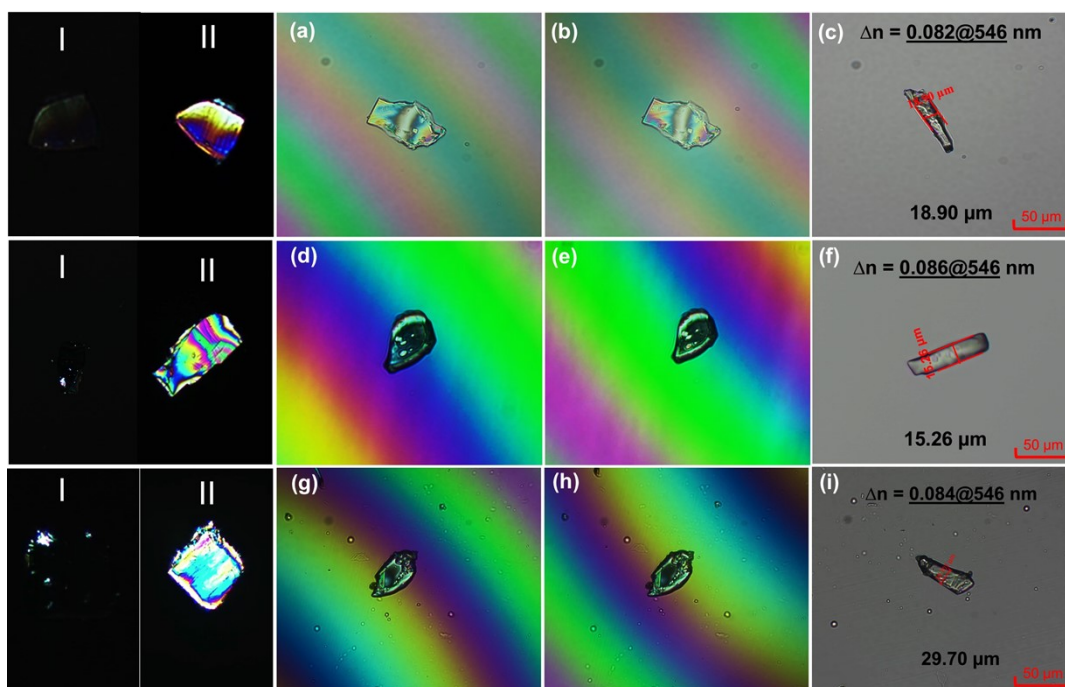

**Fig. S6.** Birefringence measurements of  $A\text{Ca}(\text{NO}_3)_3 \cdot 2\text{H}_2\text{O}$  ( $A = \text{NH}_4, \text{Rb}, \text{Cs}$ ) using a polarizing microscope. Panels (a,b), (d,e) and (g,h) display the views of the crystals at extinction during negative and positive rotations of the compensator for  $(\text{NH}_4)\text{Ca}(\text{NO}_3)_3(\text{H}_2\text{O})_2$ ,  $\text{RbCa}(\text{NO}_3)_3(\text{H}_2\text{O})_2$  and  $\text{CsCa}(\text{NO}_3)_3(\text{H}_2\text{O})_2$ , respectively; panels (c), (f) and (i) show the thickness of the crystals used for measurement. I and II are the extinction and brightness of crystals, respectively.

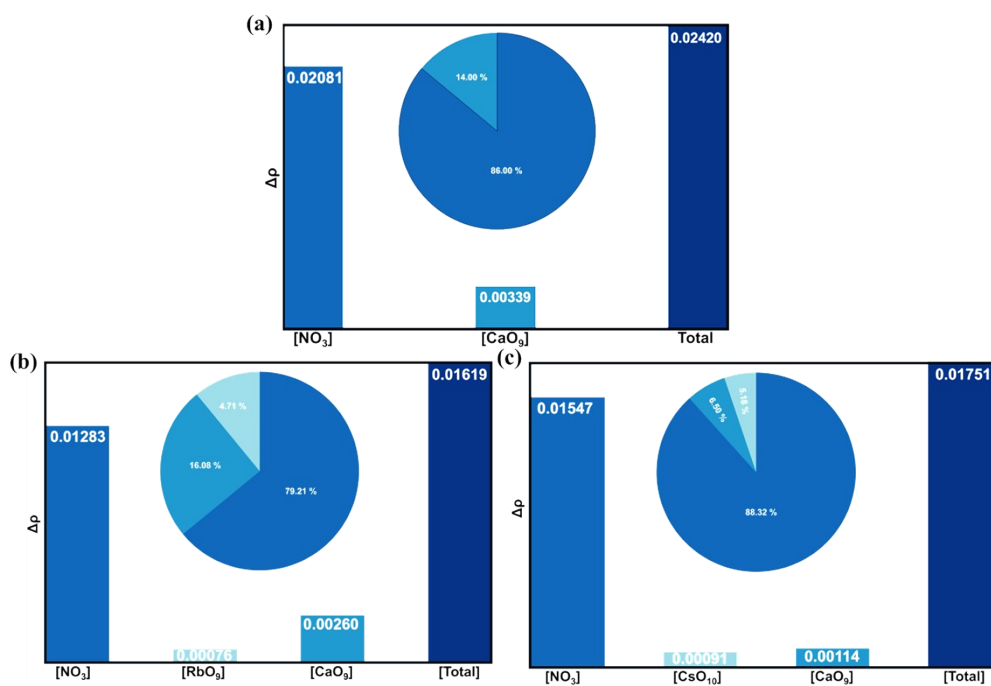

**Fig. S7.** Bonding electron density difference ( $\Delta\rho$ ) of constituent units calculated by adopting the REDA method for  $(\text{NH}_4)\text{Ca}(\text{NO}_3)_3(\text{H}_2\text{O})_2$  (a),  $\text{RbCa}(\text{NO}_3)_3(\text{H}_2\text{O})_2$  (b), and  $\text{CsCa}(\text{NO}_3)_3(\text{H}_2\text{O})_2$  (c).

Table S18. Summary of some alkali/alkaline-earth metal nitrate compounds reported in the literature.

| Compound                                                                        | Exp. Band gap (eV) | Cutoff edge (nm) | Exp. Birefringence | Reference |
|---------------------------------------------------------------------------------|--------------------|------------------|--------------------|-----------|
| $(\text{NH}_4)_3\text{ZnNO}_3\text{Cl}_4$                                       | 5.10               | 243              | 0.045@546 nm       | 1         |
| $(\text{NH}_4)_3\text{ZnNO}_3\text{I}_4$                                        | 4.03               | 308              | 0.073@546 nm       | 1         |
| $\text{Rb}_3\text{ZnNO}_3\text{I}_4$                                            | 4.34               | 286              | 0.033@546 nm       | 1         |
| $\text{Rb}_3\text{ZnNO}_3\text{Cl}_4$                                           | -                  | 222              | 0.035@546 nm       | 2         |
| $\text{Rb}_5\text{Na}(\text{NO}_3)_4\text{Cl}_2$                                | -                  | 238              | 0.083@546 nm       | 2         |
| $\text{Ba}_2(\text{OH})_3(\text{NO}_3)$                                         | 6.22               | $\leq 200$       | 0.080@589.3 nm     | 3         |
| $(\text{NH}_4)\text{Ca}(\text{NO}_3)_3 \cdot 2\text{H}_2\text{O}$               | 4.90               | 220              | 0.082@546 nm       | This work |
| $\text{RbCa}(\text{NO}_3)_3 \cdot 2\text{H}_2\text{O}$                          | 4.90               | 222              | 0.086@546 nm       | This work |
| $\text{CsCa}(\text{NO}_3)_3 \cdot 2\text{H}_2\text{O}$                          | 4.76               | 235              | 0.084@546 nm       | This work |
| $\text{Na}_3\text{K}_6(\text{CO}_3)_3(\text{NO}_3)_3 \cdot 6\text{H}_2\text{O}$ | 5.23               | 237              | 0.094@546 nm       | 4         |
| O                                                                               |                    |                  |                    |           |
| $\text{Cs}_2\text{Ca}(\text{NO}_3)_2\text{Cl}_2$                                | 5.64               | 220              | 0.104@546 nm       | 5         |

### References

- 1 Z. Zhang, Y. Wu, L. Zhang, X. Liu, Q. Feng, L. Deng, J. Li and S. Han, *Inorg. Chem.*, 2025, **64**, 17098–17103.
- 2 C. Liu, K. Hou and B. Zhang, *Results Phys.* 2024, **57**, 107340–107344.
- 3 X. Dong, L. Huang, Q. Liu, H. Zeng, Z. Lin, D. Xu and G. Zou, *Chem. Commun.*, 2018, **54**, 5792–5795.
- 4 W. Li, J. Wang, L. Liu, C. Huang, Y. Ding, M. M. Zhu, J. Tian, H. Qi, Y. Chu and J. Xu, *Inorg. Chem.*, 2024, **63**, 8408–8417.
- 5 H. Elkik, M. M. Iqbal, A. Munawar, Z. Yang, F. Zhang and S. Pan, *Inorg. Chem. Front.*, 2026, DOI: [10.1039/D6QI00086J](https://doi.org/10.1039/D6QI00086J).
